# Supplementary material for: Porous CuBi2O4 photocathodes with rationally engineered morphology and composition towards high-efficiency photoelectrochemical performance
Source: Royal Society of Chemistry journal article supplement (doi:10.1039/c9ta07892d), 2019-01-01
Supplement: c9ta07892d1.pdf [file c9ta07892d1.pdf]

## Supporting Information

### **Porous CuBi<sub>2</sub>O<sub>4</sub> Photocathodes with Rationally Engineered Morphology and Composition towards Photoelectrochemical Water Splitting**

Youxun Xu,<sup>a</sup> Jie Jian,<sup>a</sup> Fan Li,<sup>a</sup> Wei Liu,<sup>a</sup> Lichao Jia,<sup>\*b</sup> and Hongqiang Wang<sup>\*a</sup>

*<sup>a</sup>State Key Laboratory of Solidification Processing, Center for Nano Energy Materials, School of Materials Science and Engineering, Northwestern Polytechnical University and Shaanxi Joint Laboratory of Graphene, Xi'an, 710072, P. R. China.*

*<sup>b</sup>Key Laboratory of Applied Surface and Colloid Chemistry, National Ministry of Education, Shaanxi Key Laboratory for Advanced Energy Devices, Shaanxi Engineering Lab for Advanced Energy Technology, School of Materials Science and Engineering, Institution Shaanxi Normal University, Address 2620 West Chang'an Street, Xi'an, Shaanxi, 710119, China.*

*† E-mail: hongqiang.wang@nwpu.edu.cn; lichaojia@snnu.edu.cn*

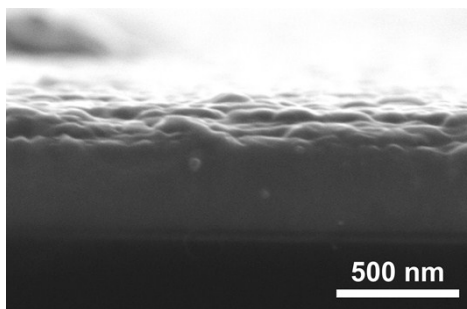

Figure S1. Cross sectional SEM image of the CuBi<sub>2</sub>O<sub>4</sub> film by spin coating 0.15 M precursor solution with no F-108 (CBO).

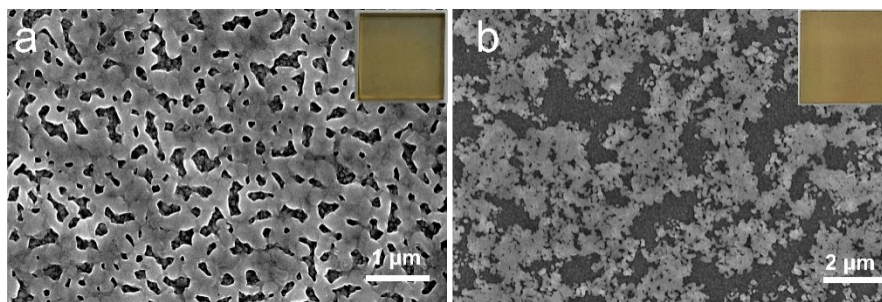

Figure S2. SEM images of  $\text{CuBi}_2\text{O}_4$  film by spin coating 0.15 M precursor solution with (a) 0.05 mg/ml F-108 (CBO-F-108-1) and (b) 0.25 mg/ml F-108 (CBO-F-108-1).

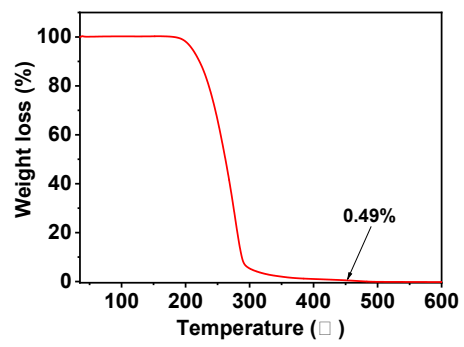

Figure S3. TG curve of F-108.

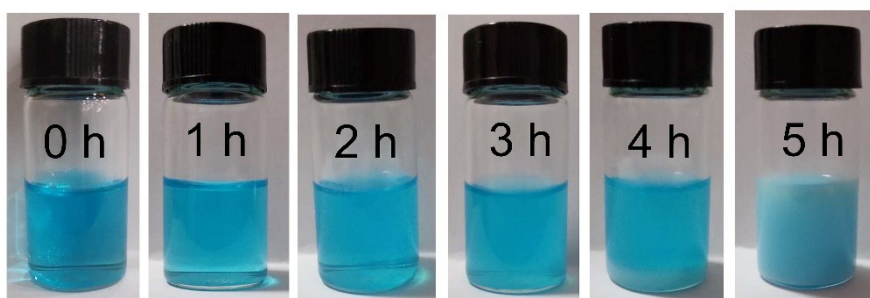

Figure S4. Photographs of precursor solution with ethanol and acetic acid (2:1 by volume) aging for different time of periods.

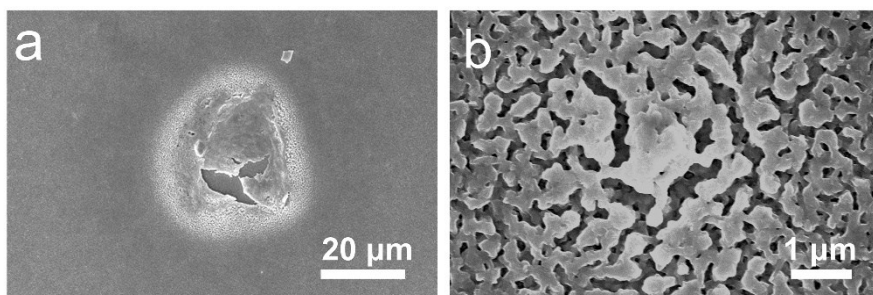

Figure S5. SEM images of uneven  $\text{CuBi}_2\text{O}_4$  films by spin coating hydrolyzed precursor solution.

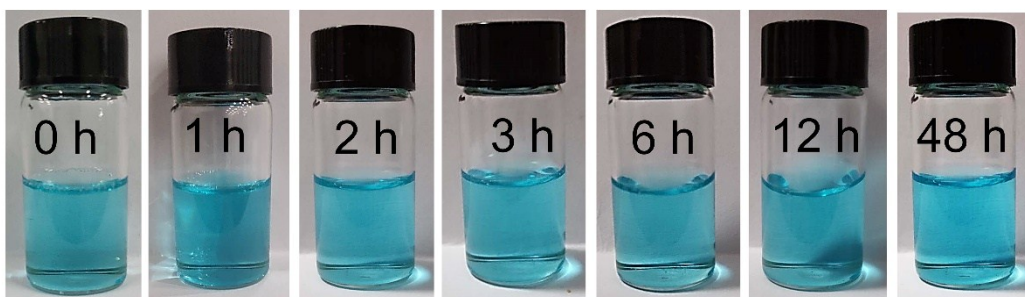

Figure S6. Photographs of precursor solution with 35% ethylene glycol by volume aging for different time of periods.

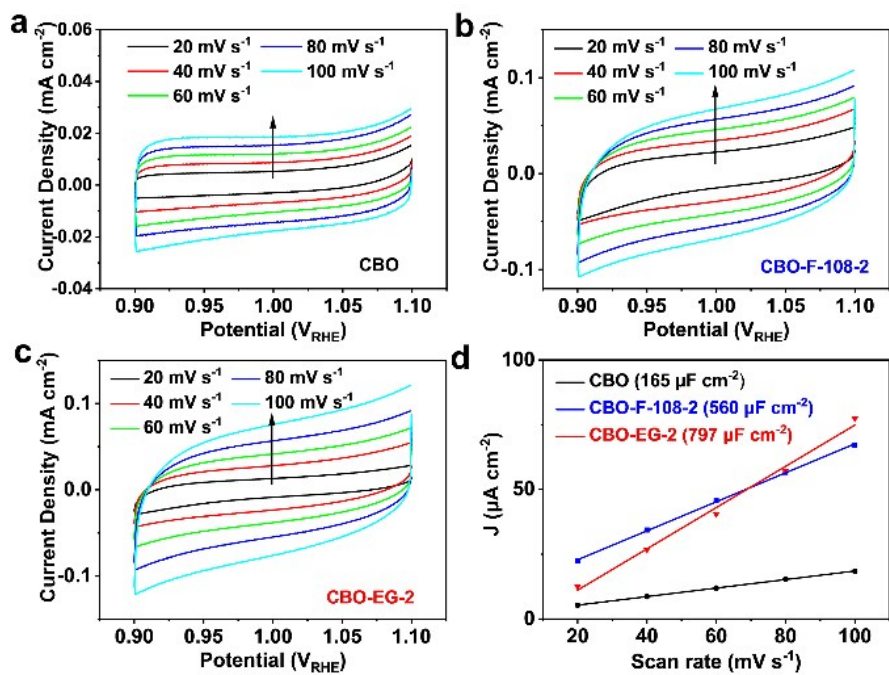

Figure S7. Cyclic voltammetry curves of (a) CBO (no F-108, no EG), (b) CBO-F-108-2 and (c) CBO-EG-2 photocathodes at various scan rates (20-100  $\text{mV s}^{-1}$ ). (d) Estimate of double layer capacitance to reflect the electrochemical active surface area.



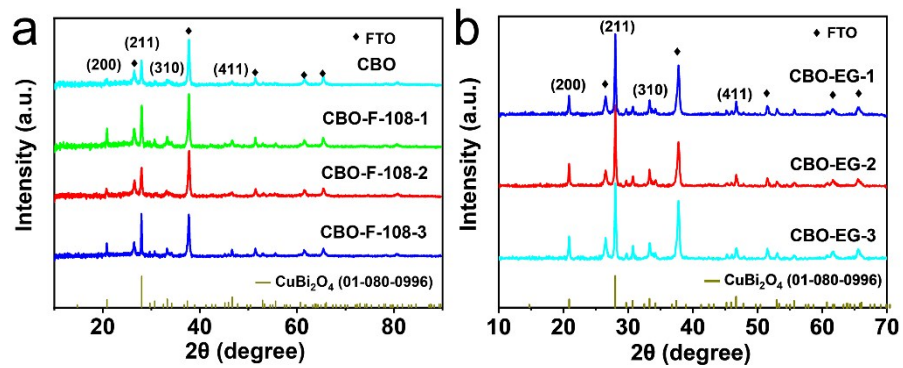

Figure S8. (a) XRD patterns of CBO (no F-108 and no EG), CBO-F-108-1, CBO-F-108-2 and CBO-F-108-3. (b) XRD patterns of CBO-EG-1, CBO-EG-2 and CBO-EG-3.

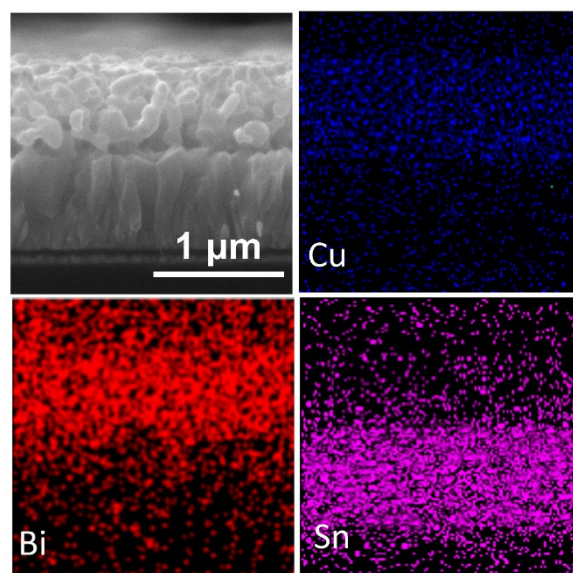

Figure S9. Cross-sectional SEM-EDS mapping of CBO-EG-2 film.

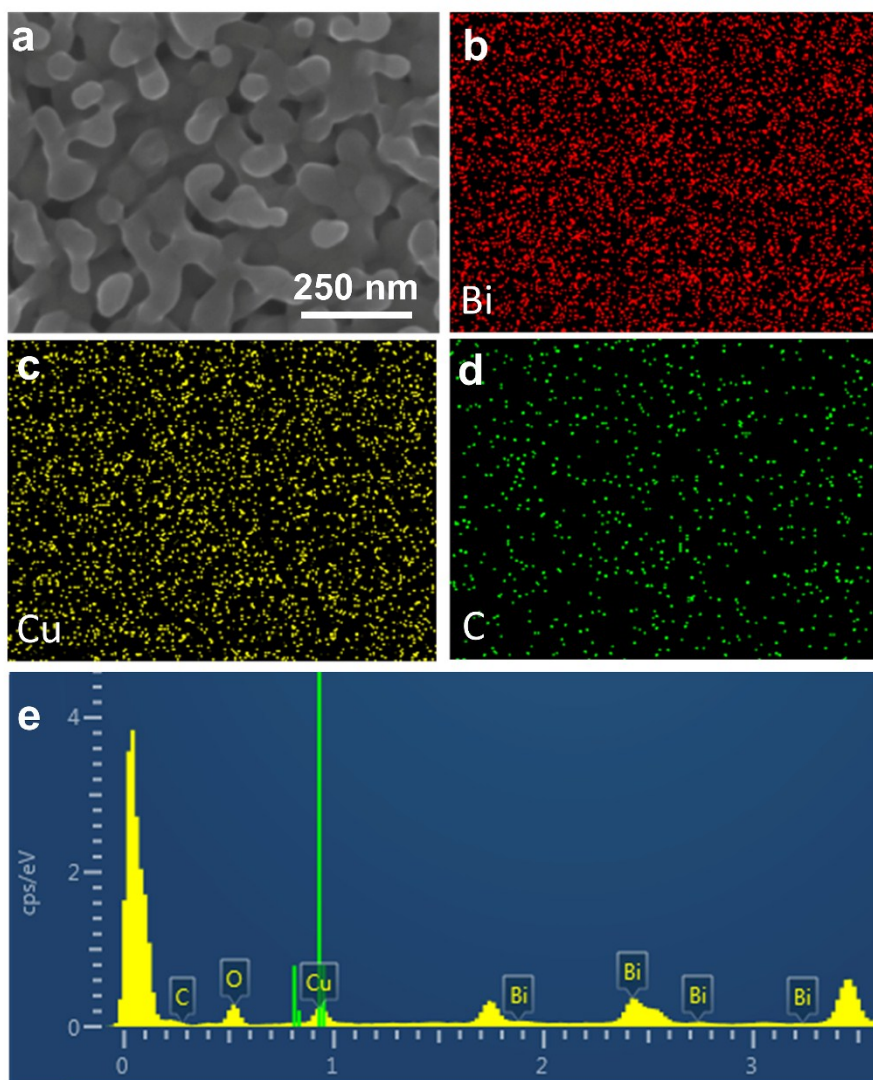

Figure S10. (a)-(d) SEM-EDS mappings of CBO-EG-2 calcining at 450 °C for 1h. (e) Element content distribution map of the  $\text{CuBi}_2\text{O}_4$  film.

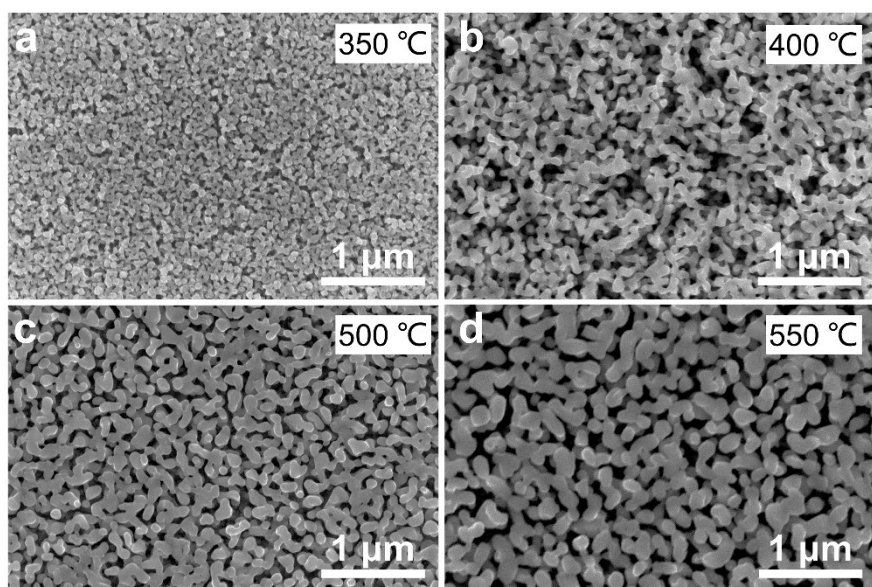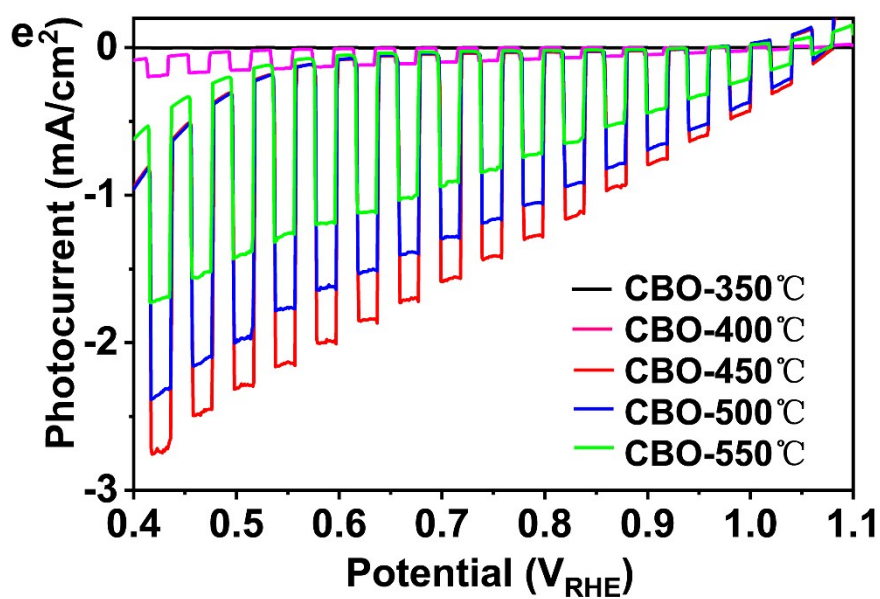

Figure S11. SEM images of nanoporous  $\text{CuBi}_2\text{O}_4$  films calcined at different temperatures: (a) 350 °C, (b) 400 °C, (c) 500 °C, and (d) 550 °C. (e) Chopped LSV scans of these samples performed in 0.3 M  $\text{K}_2\text{SO}_4$  and 0.2 M phosphate buffer (pH 6.65) with  $\text{H}_2\text{O}_2$  back AM1.5 illumination.

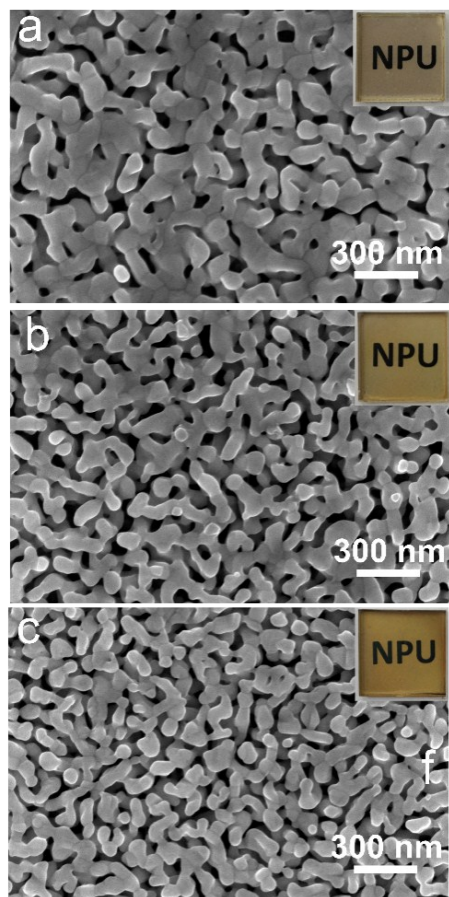

Figure S12. SEM images of nanoporous  $\text{CuBi}_2\text{O}_4$  films with different thicknesses: (a) 150 nm, (b) 300 nm, and (c) 400 nm.

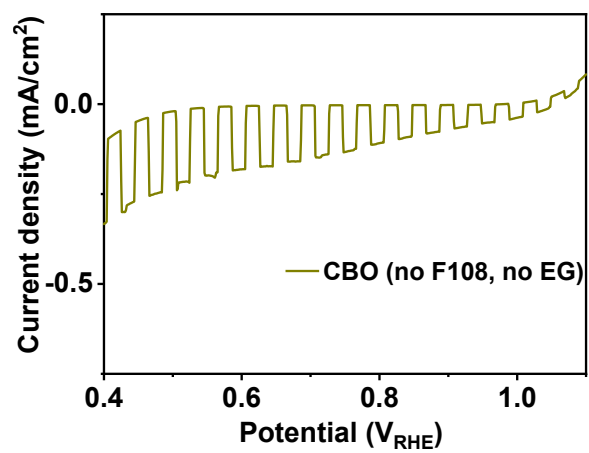

Figure S13. Chopped (light/dark) LSV scans of CBO (no F-108, no EG) performed in 0.3 M K<sub>2</sub>SO<sub>4</sub> and 0.2 M phosphate buffer (pH 6.65) with H<sub>2</sub>O<sub>2</sub> back AM1.5 illumination.

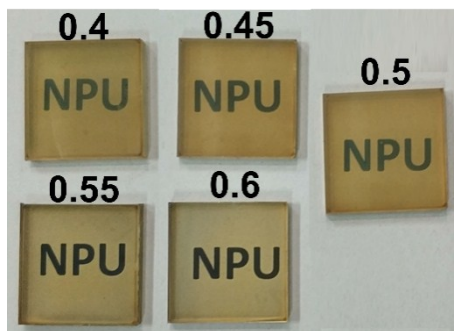

Figure S14. Digital photographs of CBO films with various Cu/Bi ratios.

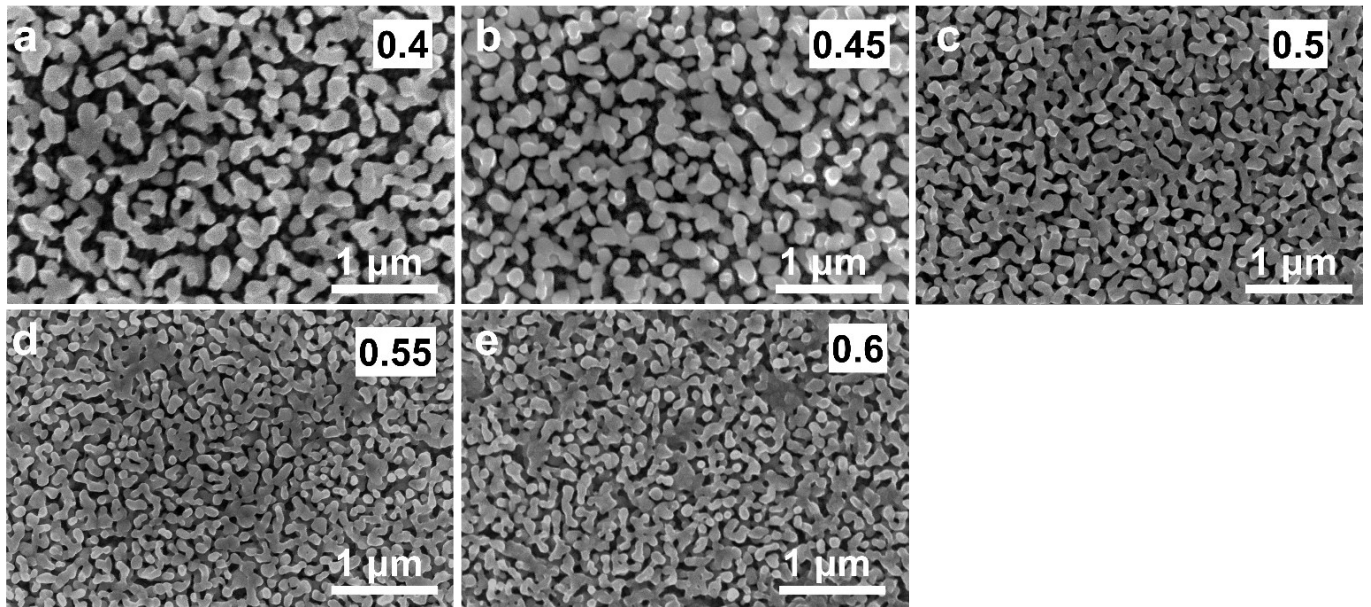

Figure S15. SEM images of CBO films with various Cu/Bi ratios.



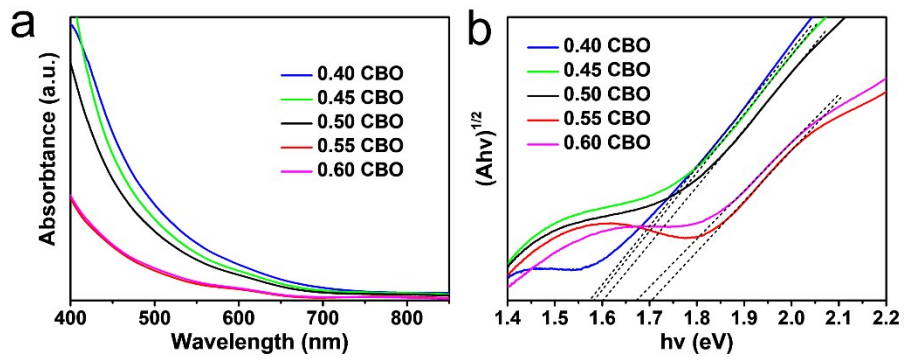

Figure S16. (a) UV/Vis absorbance spectra of CBO films with various Cu/Bi ratios. (b) Tauc plots of CBO films converted from the UV/Vis absorbance spectra. Bandgap of CBO films are 1.57, 1.58, 1.60, 1.70, and 1.67 eV for 0.40 CBO, 0.45 CBO, 0.50 CBO, 0.55 CBO, and 0.60 CBO samples.

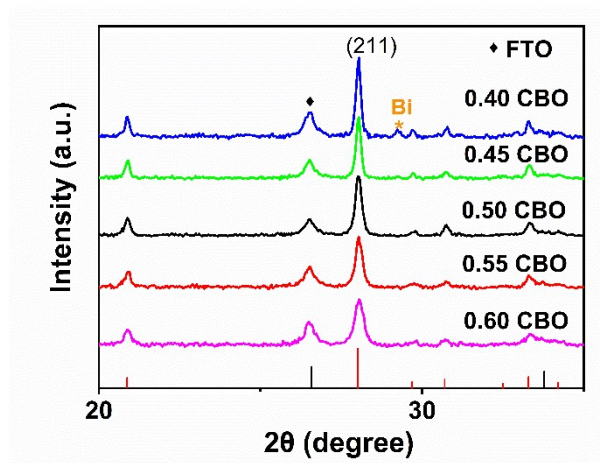

Figure S17. XRD patterns of the fabricated photocathodes.

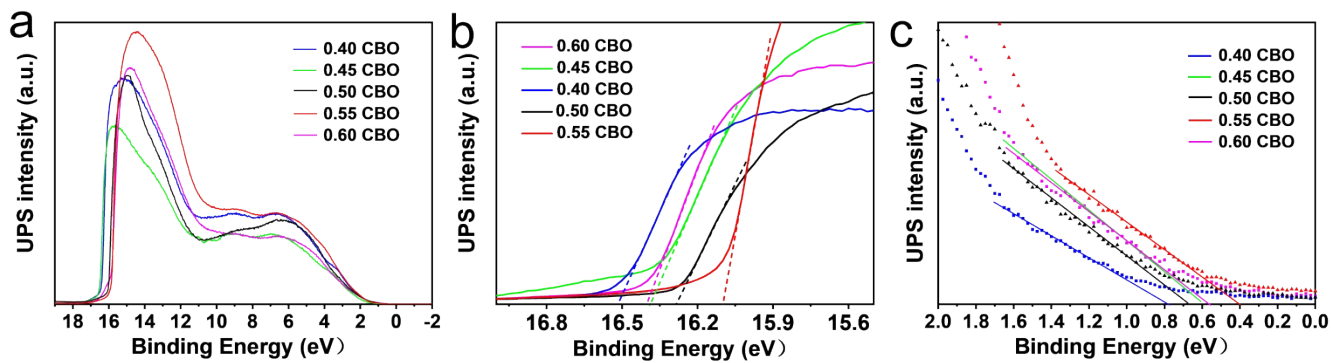

Figure S18. (a) UPS cutoff spectra for different CBO films; Magnified UPS spectra used to estimate (b) work function and (c) VBM.

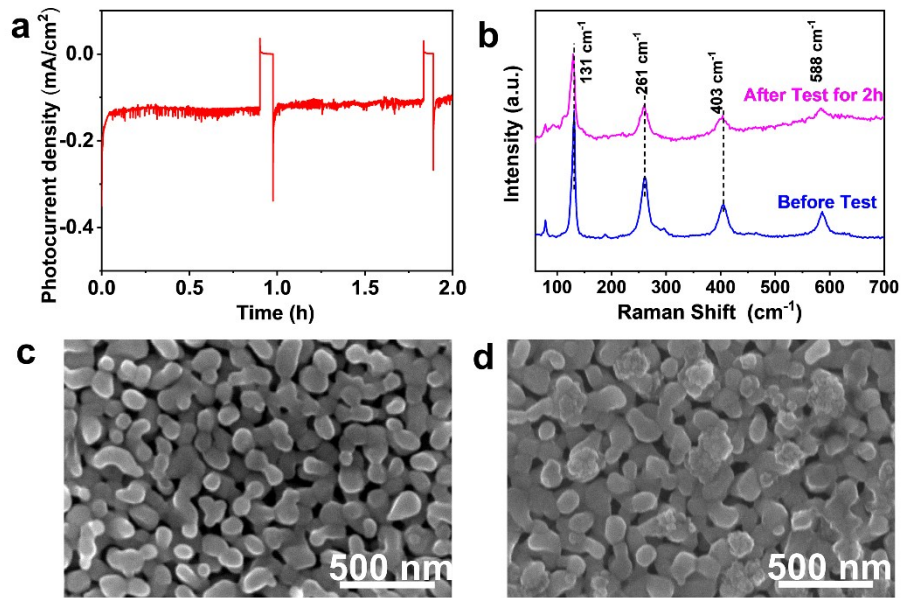

Figure S19. (a) Constant potential measurements for 0.55 CBO photocathode at 0.6 V vs RHE in 0.3 M K<sub>2</sub>SO<sub>4</sub> and 0.2 M phosphate buffer (pH 6.65), the on and off photocurrent at around 1.0 h and 2.0 h was due to the chopped illumination of the light source. (b) Raman spectra of 0.55 CBO photocathode before and after stability test. SEM images of 0.55 CBO photocathode (c) before test and (d) after test.

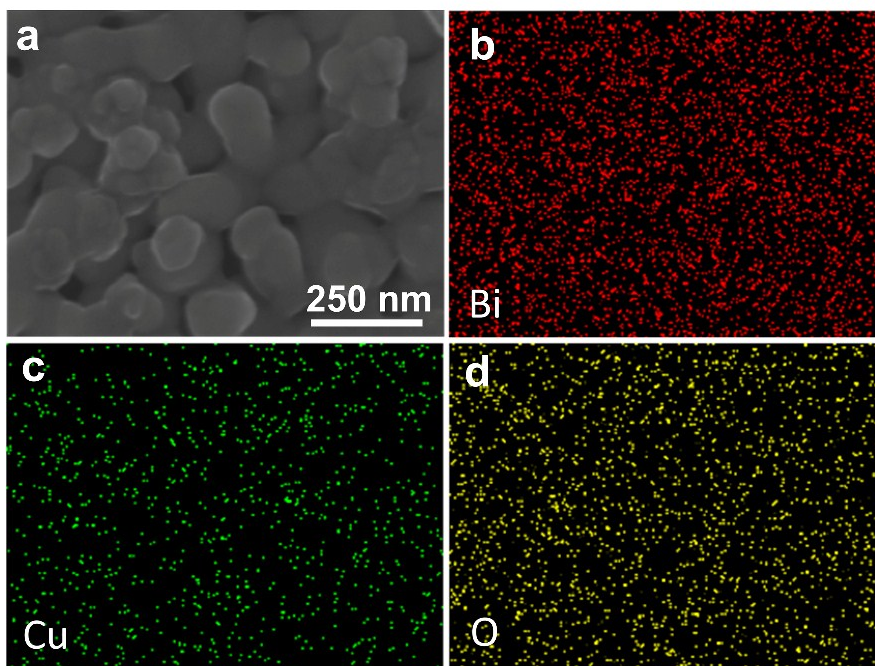

Figure S20. SEM-EDS mapping of 0.55 CBO photocathode after testing for two hours at 0.6 V vs RHE in 0.3 M  $K_2SO_4$  and 0.2 M phosphate buffer (pH 6.65).

Table S1. Process parameters of CuBi<sub>2</sub>O<sub>4</sub> films with different thicknesses.

| <b>Thickness</b>                    | <b>150 nm</b>                                 | <b>300 nm</b>                                 | <b>400 nm</b>                                 |
|-------------------------------------|-----------------------------------------------|-----------------------------------------------|-----------------------------------------------|
| <b>Precursor concentration (Cu)</b> | 0.12 M                                        | 0.18 M                                        | 0.225 M                                       |
| <b>Solvent</b>                      | acetic acid : ethanol : ethylene glycol 1:1:1 | acetic acid : ethanol : ethylene glycol 1:1:1 | acetic acid : ethanol : ethylene glycol 1:1:1 |
| <b>F-108</b>                        | 0.1 g/ml                                      | 0.2 g/ml                                      | 0.225 g/ml                                    |
| <b>Rotating speed</b>               | 2000r,10s; 4500r,40s                          | 2000r,10s; 3500r,40s                          | 2000r,10s; 3000r,40s                          |
| <b>Preheating temperature</b>       | 150 °C                                        | 150 °C                                        | 125 °C                                        |
| <b>Calcination temperature</b>      | 450 °C                                        | 450 °C                                        | 450 °C                                        |

Table S2. Series resistance ( $R_s$ ) and charge transfer resistance ( $R_{ct}$ ) of different  $\text{CuBi}_2\text{O}_4$  samples.

| <b>Sample (Cu/Bi ratio)</b> | <b><math>R_s</math> (ohm)</b> | <b><math>R_{ct}</math> (ohm)</b> |
|-----------------------------|-------------------------------|----------------------------------|
| <b>0.4 CBO</b>              | 78                            | 15000                            |
| <b>0.45 CBO</b>             | 80                            | 5437                             |
| <b>0.5 CBO</b>              | 77                            | 6132                             |
| <b>0.55 CBO</b>             | 84                            | 4980                             |
| <b>0.6 CBO</b>              | 1980                          | 9440                             |

Table S3. Flat-band potential ( $\phi_{fb}$ ) and acceptor density ( $N_A$ ) of different Cu/Bi ratio CBO samples calculated by Mott-Schottky plot.

| Sample (Cu/Bi ratio) | $\phi_{fb}$ ( $V_{RHE}$ ) | $N_A$ ( $cm^{-3}$ )  |
|----------------------|---------------------------|----------------------|
| <b>0.4 CBO</b>       | 1.31                      | $1.7 \times 10^{18}$ |
| <b>0.45 CBO</b>      | 1.35                      | $2.3 \times 10^{18}$ |
| <b>0.5 CBO</b>       | 1.31                      | $2.4 \times 10^{18}$ |
| <b>0.55 CBO</b>      | 1.26                      | $4.2 \times 10^{18}$ |
| <b>0.6 CBO</b>       | 1.31                      | $2.5 \times 10^{18}$ |



Table S4. Bandgap and positions (distance from the vacuum level) of VBM ( $E_v$ ), CBM ( $E_c$ ), and Fermi level ( $E_f$ ) of CBO samples determined by UV/Vis spectroscopy and UPS.

| <b>Sample (Cu/Bi ratio)</b> | <b><math>E_g</math> (eV)</b> | <b><math>E_v</math> (eV)</b> | <b><math>E_c</math> (eV)</b> | <b><math>E_f</math> (eV)</b> |
|-----------------------------|------------------------------|------------------------------|------------------------------|------------------------------|
| <b>0.4 CBO</b>              | 1.57                         | 5.47                         | 3.90                         | 4.69                         |
| <b>0.45 CBO</b>             | 1.58                         | 5.42                         | 3.84                         | 4.82                         |
| <b>0.5 CBO</b>              | 1.60                         | 5.60                         | 4.00                         | 4.92                         |
| <b>0.55 CBO</b>             | 1.67                         | 5.51                         | 3.84                         | 5.11                         |
| <b>0.6 CBO</b>              | 1.70                         | 5.36                         | 3.66                         | 4.81                         |

Table S5. Experimental results summary for the recently published CuBi<sub>2</sub>O<sub>4</sub> photocathodes for PEC water splitting.

| CuBi <sub>2</sub> O <sub>4</sub> Photocathode   | Photocurrent @ Potential (mA/cm <sup>2</sup> )                 | Electrolyte                                                                                               | Light Source                       | Preparation Technique                         | References |
|-------------------------------------------------|----------------------------------------------------------------|-----------------------------------------------------------------------------------------------------------|------------------------------------|-----------------------------------------------|------------|
| CuO/ CuBi <sub>2</sub> O <sub>4</sub> /Pt       | 0.7 @ 0 V NHE                                                  | 0.3M K <sub>2</sub> SO <sub>4</sub><br>pH 6.8                                                             | >420nm                             | Drop-casting                                  | S1         |
| FTO/Au/<br>CuBi <sub>2</sub> O <sub>4</sub> /Pt | -1.24 @ 0.1V vs<br>RHE                                         | 0.1 M Na <sub>2</sub> SO <sub>4</sub><br>pH 6.8                                                           | AM1.5G<br>Simulator                | Cathodically<br>electrochemical<br>deposition | S2         |
| Ag- CuBi <sub>2</sub> O <sub>4</sub> /Pt        | 1.0@0.6 V RHE                                                  | 0.1 M NaOH (pH<br>12.8) saturated<br>with O <sub>2</sub>                                                  | AM1.5G<br>Simulator                | Electrodeposition                             | S3         |
| CuBi <sub>2</sub> O <sub>4</sub>                | 2.0 @0.6 V RHE                                                 | 0.3 M K <sub>2</sub> SO <sub>4</sub> and<br>0.2 M phosphate<br>buffer, with H <sub>2</sub> O <sub>2</sub> | AM1.5G<br>Simulator                | Spray pyrolysis                               | S4         |
| CuBi <sub>2</sub> O <sub>4</sub>                | 0.02 @ -0.25V vs<br>Ag/AgCl                                    | 0.3 M Na <sub>2</sub> SO <sub>4</sub>                                                                     | 100 mW/cm <sup>2</sup>             | Hydrothermal                                  | S5         |
| CuBi <sub>2</sub> O <sub>4</sub> /Pt            | 0.5 @ 0.4 V RHE                                                | 0.3 M K <sub>2</sub> SO <sub>4</sub> and<br>0.2 M phosphate<br>buffer                                     | AM1.5G<br>Simulator                | Drop-casting                                  | S6         |
| CuBi <sub>2</sub> O <sub>4</sub>                | 0.07@ 0.6V vs<br>RHE                                           | 0.1 M Na <sub>2</sub> SO <sub>4</sub><br>adjusted pH 10.8                                                 | Xe lamp,<br>>420nm                 | Electrochemical<br>Synthesis                  | S7         |
| CuBi <sub>2</sub> O <sub>4</sub> /CuO           | 0.28 @ -0.4V vs<br>Ag/AgCl                                     | 0.1 M Na <sub>2</sub> SO <sub>4</sub><br>pH 6.8                                                           | Xe lamp, 400<br>W                  | Spray-coating                                 | S8         |
| CuBi <sub>2</sub> O <sub>4</sub>                | 0.03 @ -0.4V vs<br>Ag/AgCl                                     | 0.1 M Na <sub>2</sub> SO <sub>4</sub><br>pH 6.8                                                           | 500W Xe<br>lamp,>420nm<br>filter   | Electrodeposition                             | S9         |
| CuBi <sub>2</sub> O <sub>4</sub>                | 0.12@ -0.3V vs<br>Ag/AgCl                                      | 0.5 M Na <sub>2</sub> SO <sub>4</sub>                                                                     | AM 1.5, 100<br>mW cm <sup>-2</sup> | Flux-mediated one-<br>pot solution<br>process | S10        |
| Gradient CuBi <sub>2</sub> O <sub>4</sub>       | 2.5 @ 0.6V vs<br>RHE (With H <sub>2</sub> O <sub>2</sub> )     | 0.3 M K <sub>2</sub> SO <sub>4</sub> and<br>0.2 M phosphate<br>buffer (H <sub>2</sub> O <sub>2</sub> )    | AM1.5G<br>Simulator                | Spray pyrolysis                               | S11        |
| Textured<br>CuBi <sub>2</sub> O <sub>4</sub>    | 0.72 @ -0.6V vs<br>Ag/AgCl                                     | 0.1 M Na <sub>2</sub> SO <sub>4</sub><br>pH 6.8                                                           | AM1.5G<br>Simulator                | Vacuum Drop-<br>casting                       | S12        |
| Cu:NiO/CuBi <sub>2</sub> O <sub>4</sub>         | 2.83 @ 0.6V vs<br>RHE                                          | 0.3 M K <sub>2</sub> SO <sub>4</sub> and<br>0.2 M phosphate<br>buffer (H <sub>2</sub> O <sub>2</sub> )    | AM1.5G<br>Simulator                | Spray<br>pyrolysis                            | S13        |
| CuBi <sub>2</sub> O <sub>4</sub><br>(Bi:Cu=1.5) | 1.17 @ 0.58 V<br>vs RHE                                        | 0.1 M KHCO <sub>3</sub><br>with 0.1 M<br>Na <sub>2</sub> S <sub>2</sub> O <sub>8</sub> pH 8.2             | AM1.5G<br>Simulator                | spin coating                                  | S14        |
| CuBi <sub>2</sub> O <sub>4</sub>                | 2.66 @ 0.6V vs<br>RHE (With<br>H <sub>2</sub> O <sub>2</sub> ) | 0.3 M K <sub>2</sub> SO <sub>4</sub> and<br>0.2 M phosphate<br>buffer (H <sub>2</sub> O <sub>2</sub> )    | AM1.5G<br>Simulator                | spin coating                                  | This work  |

## References

- S1. H. S. Park, C.-Y. Lee and E. Reisner. Photoelectrochemical reduction of aqueous protons with a CuO|CuBi<sub>2</sub>O<sub>4</sub> heterojunction under visible light irradiation. *Phys. Chem. Chem. Phys.*, 2014, 16, 22462- 22465.
- S2. D. Cao, N. Nasori, Z. Wang, Y. Mi, L. Wen, Y. Yang, S. Qu, Z. Wang and Y. Lei. p-type CuBi<sub>2</sub>O<sub>4</sub>: an Easily Accessible Photocathodic Material for High-efficient Water Splitting. *J. Mater. Chem. A.*, 2016, 4, 8995-9001.
- S3. D. Kang, J. C. Hill, Y. Park, and K.-S. Choi. Photoelectrochemical Properties and Photostabilities of High Surface Area CuBi<sub>2</sub>O<sub>4</sub> and Ag-Doped CuBi<sub>2</sub>O<sub>4</sub> Photocathodes. *Chem. Mater.*, 2016, 28, 4331-4340.
- S4. F. Wang, A. Chemseddine, F. F. Abdi, R. van de Krol, S. P. Berglund. Spray pyrolysis of CuBi<sub>2</sub>O<sub>4</sub> photocathodes: improved solution chemistry for highly homogeneous thin films. *J. Mater. Chem. A.*, 2017, 5, 12838-12847.
- S5. L. Zhu, P. Basnet, S. R. Larson, L. P. Jones, J. Y. Howe, R. A. Tripp, and Y. Zhao. Visible Light- Induced Photoelectrochemical and Antimicrobial Properties of Hierarchical CuBi<sub>2</sub>O<sub>4</sub> by Facile Hydrothermal Synthesis. *ChemistrySelect* 2016, 1, 1518-1524.
- S6. S. P. Berglund, F. F. Abdi, P. Bogdanoff, A. Chemseddine, D. Friedrich, and R. van de Krol. Comprehensive Evaluation of CuBi<sub>2</sub>O<sub>4</sub> as a Photocathode Material for Photoelectrochemical Water Splitting. *Chem. Mater.* 2016, 28, 4231-4242.
- S7. N. T. Hahn, V. C. Holmberg, B. A. Korgel, and C. Buddie Mullins. Electrochemical Synthesis and Characterization of p- CuBi<sub>2</sub>O<sub>4</sub> Thin Film Photocathodes. *J. Phys. Chem. C* 2012, 116, 6459-6466.
- S8. M. K. Hossain, G. F. Samu, K. Gandha, S. Santhanagopalan, J. Ping Liu, C. Janáky, and K. Rajeshwar. Solution Combustion Synthesis, Characterization, and Photocatalytic Activity of CuBi<sub>2</sub>O<sub>4</sub> and Its Nanocomposites with CuO and  $\alpha$ -Bi<sub>2</sub>O<sub>3</sub>. *J. Phys. Chem. C* 2017, 121, 8252-8261.
- S9. Y. Nakabayashi, M. Nishikawa, Y. Nosaka. Fabrication of CuBi<sub>2</sub>O<sub>4</sub> photocathode through novel anodic electrodeposition for solar hydrogen production. *Electrochimica Acta*, 2014, 125, 191-198.
- S10. Y.-H. Choi, K. D. Yang, D.-H. Kim, K. T. Nam, S.-H. Hong. p-Type CuBi<sub>2</sub>O<sub>4</sub> thin films prepared by flux-mediated one-pot solution process with improved structural and photoelectrochemical characteristics. *Materials Letters*, 2017, 188, 192-196.
- S11. F. Wang, W. Septina, A. Chemseddine, F. F. Abdi, D. Friedrich, P. Bogdanoff, R. van de Krol, S. D. Tilley, and S. P. Berglund. Gradient self-doped CuBi<sub>2</sub>O<sub>4</sub> with highly improved charge separation efficiency. *J. Am. Chem. Soc.*, 2017, 139, 15094-15103.
- S12. J. Li, M. Griep, Y. Choi and D. Chu, Photoelectrochemical overall water splitting with textured CuBi<sub>2</sub>O<sub>4</sub> as a photocathode, *Chem. Commun.*, 2018, 54, 3331-3334.
- S13. A. Song, P. Plate, A. Chemseddine, F. Wang, F. F. Abdi, M. Wollgarten, R. van de Krol and S. P. Berglund, Cu:NiO as a hole-selective back contact to improve the photoelectrochemical performance of CuBi<sub>2</sub>O<sub>4</sub> thin film photocathodes, *J. Mater. Chem. A*, 2019, 7, 9183–9194.
- S14. Z. Zhang, S. A. Lindley, R. Dhall, K. Bustillo, W. Han, E. Xie, and J. K. Cooper, Beneficial CuO Phase Segregation in the Ternary p-Type Oxide Photocathode CuBi<sub>2</sub>O<sub>4</sub>, *ACS Appl. Energy Mater.* 2019, 2, 4111-4117.
